# Supplementary material for: Phosphorus addition mitigates N 2 O and CH 4 emissions in N-saturated subtropical forest, SW China
Source: Copernicus journal article supplement (doi:10.5194/bg-14-3097-2017), 2017-06-23
Supplement: Supplementary file 1 [file bg-14-3097-2017-supplement.zip]

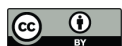

*Supplement of*

**Phosphorus addition mitigates N<sub>2</sub>O and CH<sub>4</sub> emissions in  
N-saturated subtropical forest, SW China**

**Longfei Yu et al.**

*Correspondence to:* Jan Mulder ([jan.mulder@nmbu.no](mailto:jan.mulder@nmbu.no))

- [bg-14-3097-2017-supplement-title-page.pdf](#)
- [Data Deposit\\_For Biogeosciences.xlsx](#)
- [Supplement.pdf](#)

The copyright of individual parts of the supplement might differ from the CC BY 3.0 License.
