# Supplementary material for: Phosphorus addition mitigates N 2 O and CH 4 emissions in N-saturated subtropical forest, SW China
Source: Copernicus journal article supplement (doi:10.5194/bg-14-3097-2017), 2017-06-23
Supplement: Supplementary file 2 [file bg-14-3097-2017-supplement.zip]

## Supporting Information

Phosphorus addition mitigates N<sub>2</sub>O and CH<sub>4</sub> emissions in an N-saturated subtropical forest, SW China

Longfei Yu<sup>1</sup>, Yihao Wang<sup>2,3</sup>, Xiaoshan Zhang<sup>3</sup>, Peter Dörsch<sup>1</sup>, Jan Mulder<sup>1\*</sup>

<sup>1</sup>Faculty of Environmental Sciences and Natural Resource Management, Norwegian University of Life Sciences, Postbox 5003, N-1432 Aas, Norway.

<sup>2</sup>Chongqing Academy of Forestry, 400036, Chongqing, China.

<sup>3</sup>Research Center for Eco-Environmental Sciences, Chinese Academy of Sciences, 100085, Beijing, China.

\*Correspondence: Jan Mulder, tel. +47 67231852, E-mail [jan.mulder@nmbu.no](mailto:jan.mulder@nmbu.no)

## Phosphorus adsorption by soil

The required dose of P to stimulate significant increase in soil P concentration was determined based on sorption isotherms (Singh et al., 2005). The experiment was carried out with soils (triplicates mixed within each block as one sample) in the O/A, AB and B-horizons, from each block. Briefly, 1 g dry and sieved (2 mm) soil was added to 30 ml  $\text{CaCl}_2$  solution with a gradient of initial  $\text{PO}_4^{3-}$  concentrations (0, 2.5, 5.0, 10.0, 20.0, 50.0 and 100  $\text{mg P L}^{-1}$ ). Next, the suspension was shaken for 24 h at 20 °C. The P concentration was determined by colorimetric method (M&M) after centrifugation and filtration (0.45  $\mu\text{m}$ ). No P desorption was found in the zero-P treatments (only  $\text{CaCl}_2$ ).

The results of P adsorption isotherms (Table S1 and Fig. S8) indicated medium sorption capacities in TSP soils (Singh et al., 2005). Based on P affinity constant and adsorption maxima, we chose an optimum P concentration of 1.0  $\text{mg L}^{-1}$  for the P dose. Such dose is equivalent to 79.5  $\text{kg P ha}^{-1}$  in TSP soil (0.3  $\text{g P kg}^{-1}$  dw soil).

**Table S1** P adsorption maximum, affinity constant and maximum buffering capacity obtained from Langmuir isotherms. The linear equation is  $C / (x/m) = 1 / (kb) + C / b$ ; where C ( $\text{mg P L}^{-1}$ ) is the equilibrium P concentration; x/m ( $\text{mg P kg}^{-1}$ ) is the amount of P adsorbed per unit mass of adsorbent; k ( $\text{L mg}^{-1} \text{P}$ ) is the P affinity constant; b ( $\text{mg P kg}^{-1}$ ) is the P adsorption maximum.

|         |     | Adsorption<br>maximum (b)<br>( $\text{mg P kg}^{-1}$ ) | P affinity<br>constant (k)<br>( $\text{L mg}^{-1} \text{P}$ ) | Maximum<br>buffering capacity<br>(mbc) ( $\text{L kg}^{-1}$ ) |
|---------|-----|--------------------------------------------------------|---------------------------------------------------------------|---------------------------------------------------------------|
| Block 1 | O/A | 435                                                    | 0.17                                                          | 75                                                            |
|         | AB  | 303                                                    | 0.20                                                          | 62                                                            |
|         | B   | 278                                                    | 1.00                                                          | 277                                                           |
| Block 2 | O/A | 345                                                    | 0.10                                                          | 34                                                            |
|         | AB  | 182                                                    | 0.27                                                          | 49                                                            |
|         | B   | 278                                                    | 0.24                                                          | 65                                                            |
| Block 3 | O/A | 345                                                    | 0.16                                                          | 57                                                            |
|         | AB  | 278                                                    | 0.26                                                          | 73                                                            |
|         | B   | 357                                                    | 0.28                                                          | 99                                                            |

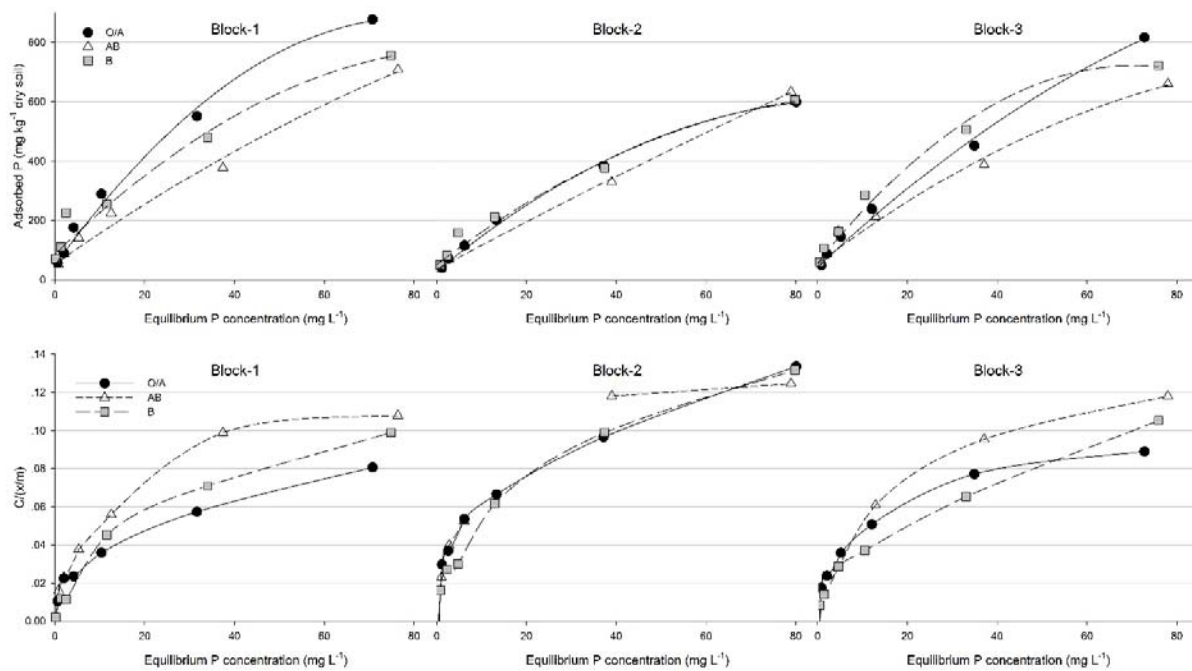

**Fig. S1** Langmuir adsorption isotherms of soils from O/A, AB and B horizons in Block 1-3. The data were fitted to the Langmuir equation, after linearization.

**Table S2** Na<sup>+</sup> concentrations in soil water at 5- and 20-cm depths in the References and P treatments. Values are means and standard deviations (in brackets) (n = 9).

| Sampling date         | Na <sup>+</sup> concentration at 5 cm (mg L <sup>-1</sup> ) |             | Na <sup>+</sup> concentration at 20 cm (mg L <sup>-1</sup> ) |             |
|-----------------------|-------------------------------------------------------------|-------------|--------------------------------------------------------------|-------------|
|                       | Reference                                                   | P           | Reference                                                    | P           |
| 14/06/18 <sup>†</sup> | 0.68 (0.58)                                                 | 5.19 (3.15) | 1.31 (0.98)                                                  | 3.15 (2.38) |
| 14/09/21              | 0.54 (0.50)                                                 | 2.01 (0.86) | 0.83 (0.91)                                                  | 3.00 (1.33) |
| 15/01/13              | 0.69 (0.31)                                                 | 1.39 (0.50) | 1.10 (0.68)                                                  | 2.97 (1.65) |
| 15/10/07              | 0.52 (0.36)                                                 | 0.56 (0.65) | 0.53 (0.34)                                                  | 1.09 (1.25) |

<sup>†</sup>One month after P application (14/05/04).

**Table S3** Half-yearly tree biomass, 500-needle weight and needle nutrient contents in the References and P treatments<sup>†</sup>. Values are means and standard deviations (in brackets) (n = 9).

|              |           | 500-<br>needle<br>g | Tree<br>Biomass<br>s t ha <sup>-1</sup> | Total C<br>g kg <sup>-1</sup> | Total N<br>g kg <sup>-1</sup> | Total P<br>g kg <sup>-1</sup> | C/N | N/P | K<br>g kg <sup>-1</sup> | Mg<br>g kg <sup>-1</sup> | Ca<br>g kg <sup>-1</sup> |
|--------------|-----------|---------------------|-----------------------------------------|-------------------------------|-------------------------------|-------------------------------|-----|-----|-------------------------|--------------------------|--------------------------|
| Nov.<br>2013 | Reference | 13.8                | 149                                     | 510                           | 15.2                          | 0.71                          | 34  | 22  | 4.6                     | 1.3                      | 4.5                      |
|              |           | (1.8)               | (11)                                    | (9)                           | (0.8)                         | (0.04)                        | (2) | (1) | (0.8)                   | (0.2)                    | (1.3)                    |
|              | P         | 12.5                | 131                                     | 517                           | 14.7                          | 0.73                          | 35  | 20  | 4.7                     | 1.4                      | 5.3                      |
|              |           | (1.9)               | (25)                                    | (6)                           | (1.0)                         | (0.05)                        | (2) | (3) | (0.7)                   | (0.2)                    | (0.6)                    |
| Nov.<br>2014 | Reference | 13.8                | 148                                     | 551                           | 14.9                          | 0.88                          | 37  | 17  | 6.6                     | 1.6                      | 7.8                      |
|              |           | (2.3)               | (12)                                    | (11)                          | (1.5)                         | (0.09)                        | (7) | (1) | (1.2)                   | (0.3)                    | (2.4)                    |
|              | P         | 14.3                | 133                                     | 550                           | 14.6                          | 0.85                          | 38  | 17  | 5.9                     | 1.6                      | 5.6                      |
|              |           | (2.3)               | (27)                                    | (9)                           | (1.1)                         | (0.11)                        | (4) | (1) | (0.9)                   | (0.4)                    | (3.1)                    |
| Feb.<br>2016 | Reference | 12.9                | 143                                     | - *                           | -                             | -                             | -   | -   | -                       | -                        | -                        |
|              |           | (2.3)               | (8)                                     |                               |                               |                               |     |     |                         |                          |                          |
|              | P         | 10.8                | 129                                     | -                             | -                             | -                             | -   | -   | -                       | -                        | -                        |
|              |           | (2.4)               | (29)                                    |                               |                               |                               |     |     |                         |                          |                          |

<sup>†</sup> P addition was conducted on 14/05/04

\* Data were not available.

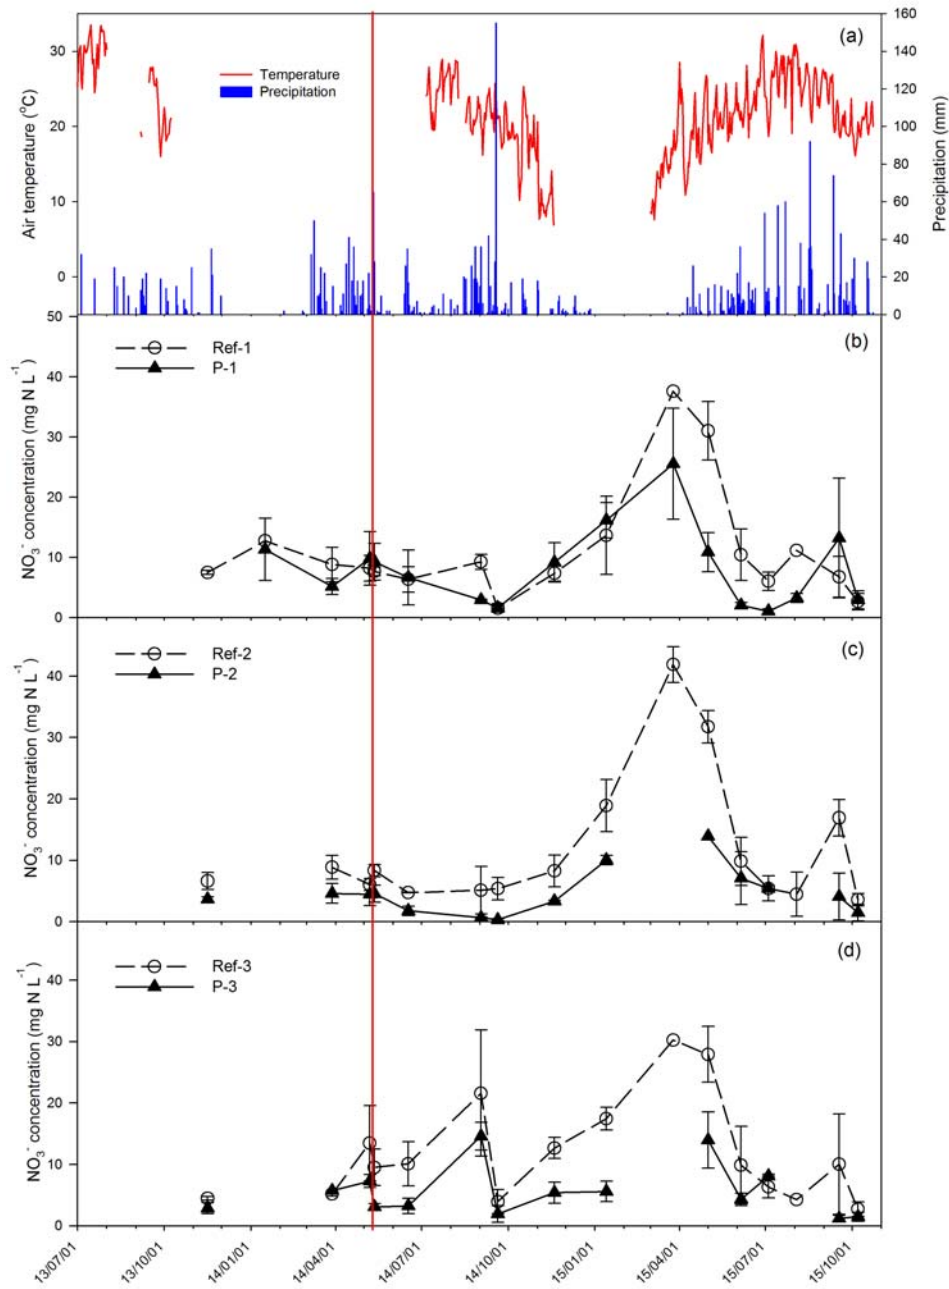

**Fig. S2** Daily mean air temperature and precipitation (a), and monthly mean  $\text{NO}_3^-$  concentrations ( $\pm$ SE) at the 5-cm soil depth in the References and P treatments for three blocks (b-d) during two years; the red line refers to the date when P addition was conducted (for P treatments only).

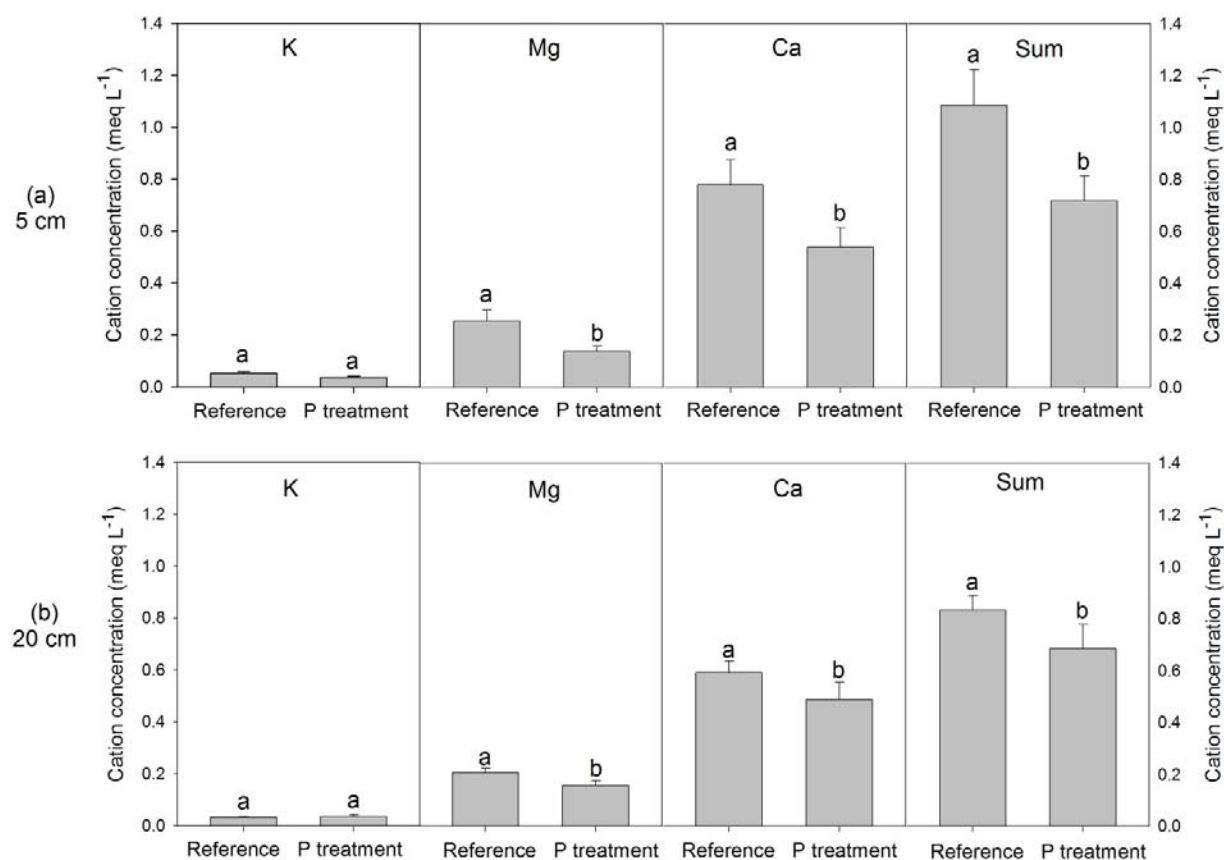

**Fig. S3** Mean soil cation concentrations (K<sup>+</sup>, Mg<sup>2+</sup>, Ca<sup>2+</sup> and Sum) at 5-cm (a) and 20-cm (b) soil depths in the References and P treatments during 1.5 years after P addition; small letters indicate significance levels of difference between two treatments; error bars are presented as SE.

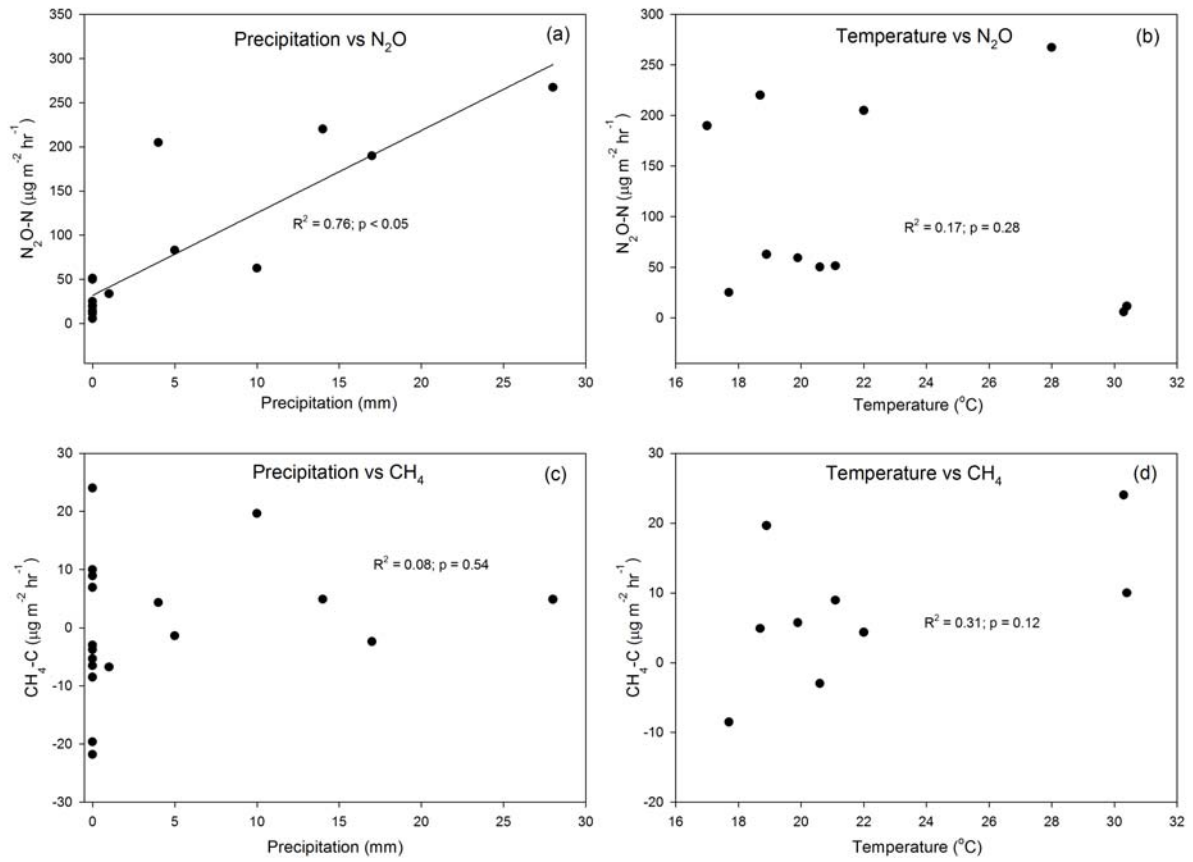

**Fig. S4** Relationship between climatic factors (daily mean temperature and precipitation) and gas fluxes (mean monthly fluxes for N<sub>2</sub>O (a&b) and CH<sub>4</sub> (c&d) from the References); due to temperature data missing from November 2013 to July 2014, fewer data points were presented in comparisons with temperature.



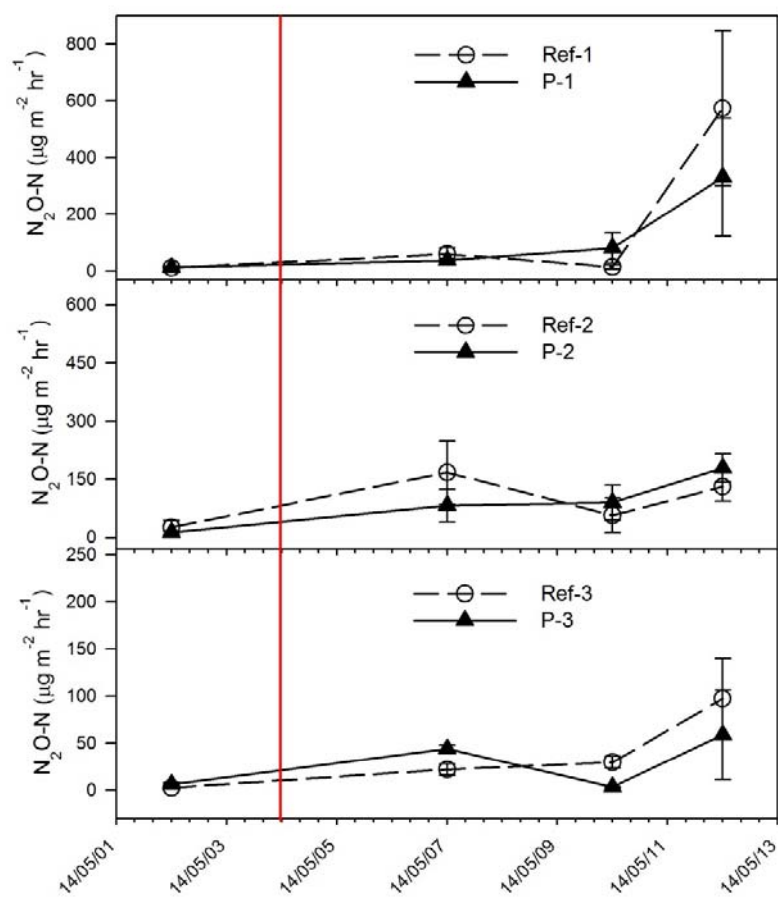

**Fig. S5** Mean  $N_2O$  fluxes ( $\pm SE$ ) in the References and P treatments for three blocks, during the 10 days before and after P application on 4 May 2014.

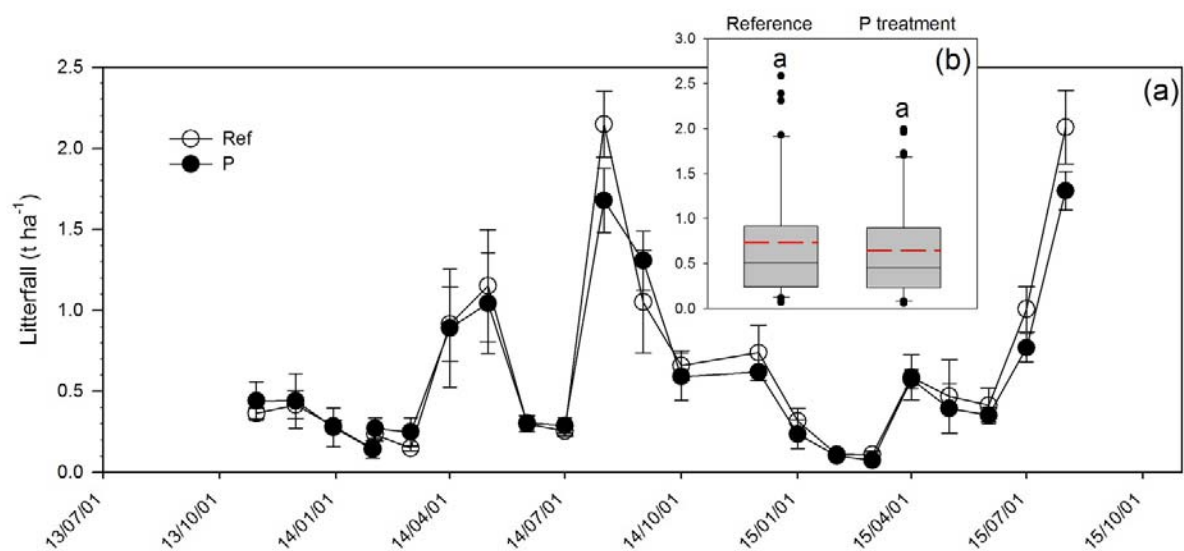

**Fig. S6 (a)** Mean monthly litterfall ( $\pm$ SE) in the Reference and P treatment during two years; **(b)** Box whisker plots of monthly litterfall in the Reference and P treatment; small letters indicate significance levels of difference.

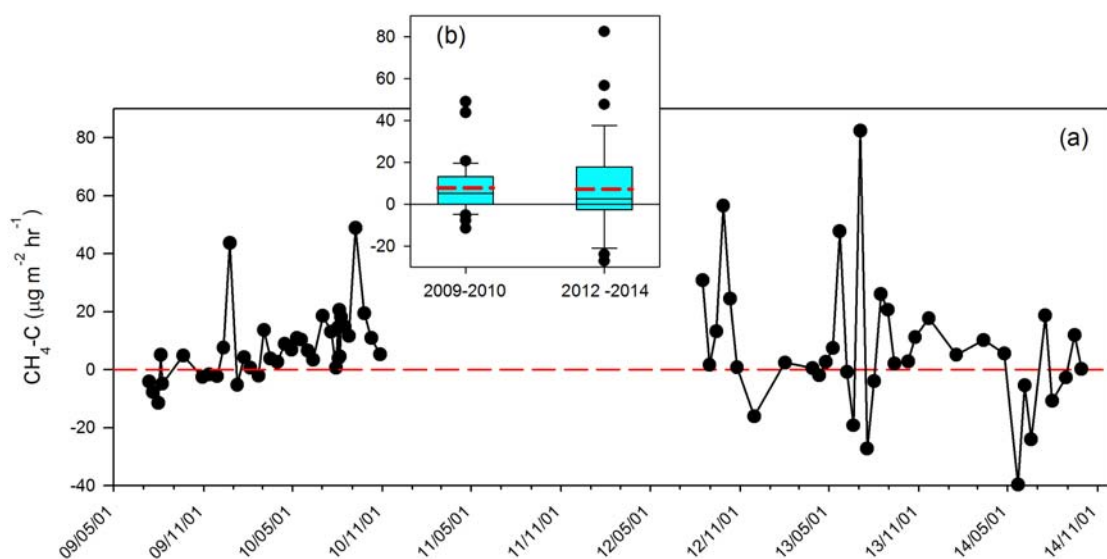

**Fig. S7 (a)** Temporal variations of CH<sub>4</sub> fluxes (±SE) from 2009 to 2014 at TSP forest; red dash line refers to the zero flux;

**(b)** Box whisker plots of CH<sub>4</sub> fluxes for 2009-2012 and 2012-2014 periods, respectively; red dash lines refer to the mean values. Data for long-term CH<sub>4</sub> fluxes were obtained from Zhu et al. (unpublished).
